# Supplementary material for: Primary ovarian insufficiency consequence of autoimmune diseases: a bidirectional two-sample Mendelian randomization study
Source: PubMed Central journal article supplement (PMC11663653; doi:10.3389/fendo.2024.1417896), 2024-12-09

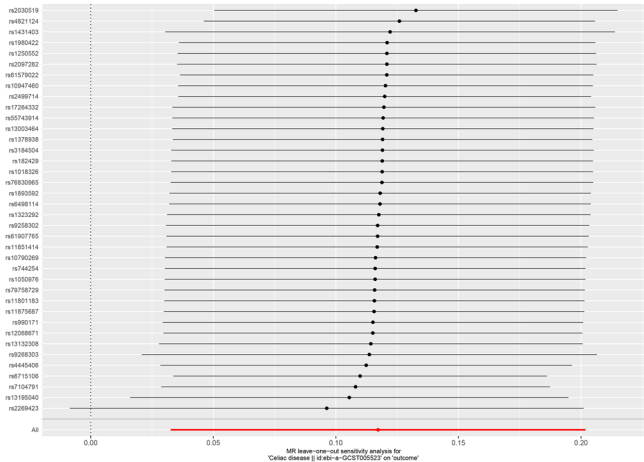

Supplement: DataSheet1.pdf [file DataSheet1.pdf]
